# Supplementary material for: Two-dimensional ice-like water adlayers on a mica surface with and without a graphene coating under ambient conditions
Source: Royal Society of Chemistry journal article supplement (doi:10.1039/d4nr00748d), 2024-01-01
Supplement: d4nr00748d13.pdf [file d4nr00748d13.pdf]

## Supporting Information for “Two-dimensional Ice-like water adlayers on a mica surface with and without a graphene coating under ambient conditions”

Xiaojiao Li,<sup>‡a</sup> Ye-Guang Fang,<sup>‡b</sup> Qi Bai,<sup>a</sup> Jian Jiang,<sup>c</sup> Xiao Cheng Zeng,<sup>\*cd</sup> Joseph S. Francisco,<sup>\*e</sup> Chongqin Zhu<sup>\*a</sup> and Weihai Fang<sup>a</sup>

<sup>1</sup> Key Laboratory of Theoretical and Computational Photochemistry, Ministry of Education, College of Chemistry, Beijing Normal University, Beijing 100875, China.

<sup>2</sup> Laboratory of Theoretical and Computational Nanoscience, CAS Key Laboratory of Nanosystem and Hierarchical Fabrication, CAS Center for Excellence in Nanoscience, National Center for Nanoscience and Technology, Beijing 100190, China.

<sup>3</sup> Department of Materials Science and Engineering, City University of Hong Kong, Kowloon 999077, Hong Kong Special Administrative Region.

<sup>4</sup> Department of Chemistry, University of Nebraska-Lincoln, Lincoln, NE 68588, USA.

<sup>5</sup> Department of Earth and Environmental Science and Department of Chemistry, University of Pennsylvania, Philadelphia, PA 19104, USA.

\*Corresponding Author(s): cqzhu@bnu.edu.cn; xzeng26@cityu.edu.hk; frjoseph@sas.upenn.edu

‡ X. Li and Y.-G. Fang contributed equally to this work.

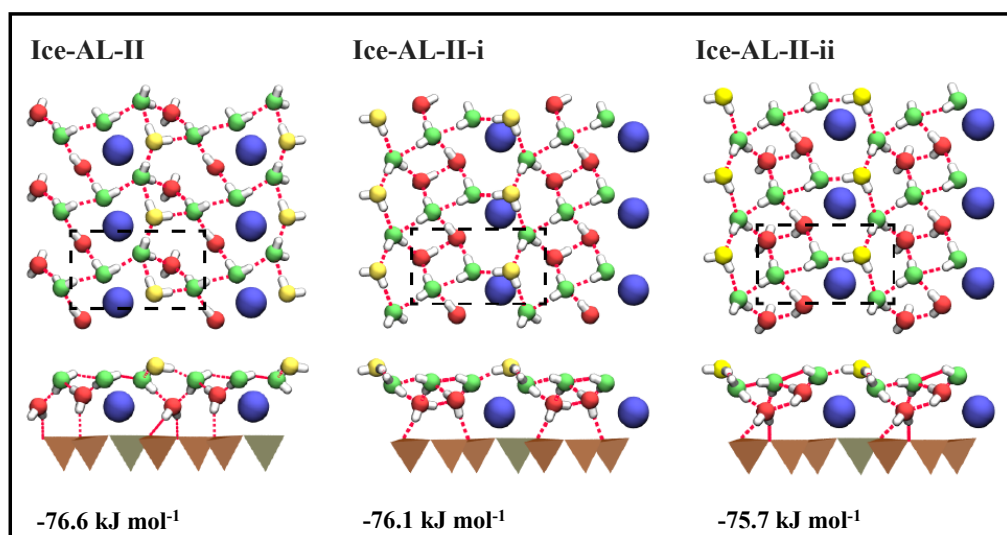

**Fig. S1** Three configurations observed in the AIMD simulation of water on mica surface have the same lattice of oxygen atoms as Ice-AL-II, but have different H-bonds networks. The binding energy per water is shown below each configuration.

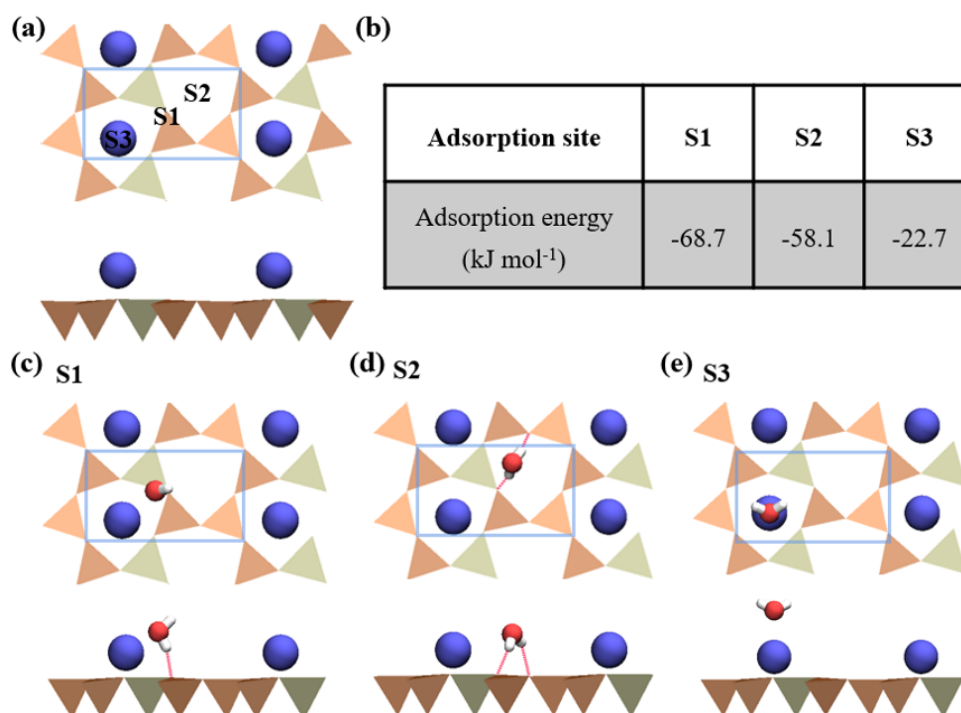

**Fig. S2** (a) Schematic representation of the three adsorption sites on the mica surface, i.e. S1, S2, and S3. (b) Adsorption energies of a water molecule adsorbed in these three adsorption sites and the corresponding adsorption configurations (c-e). Unit cell are indicated by blue rectangles.

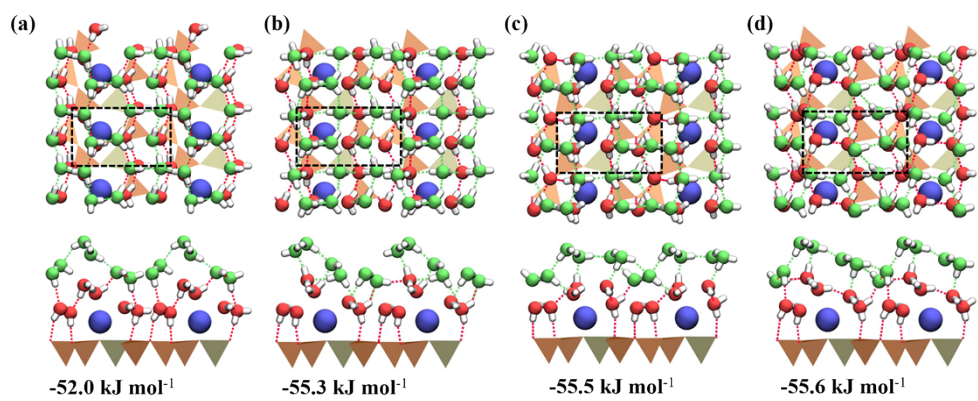

**Fig. S3** Top and side views of the optimized AA-stacked (a) and AB-stacked (b-d) bilayer Ice-AL-I structures on mica surface.

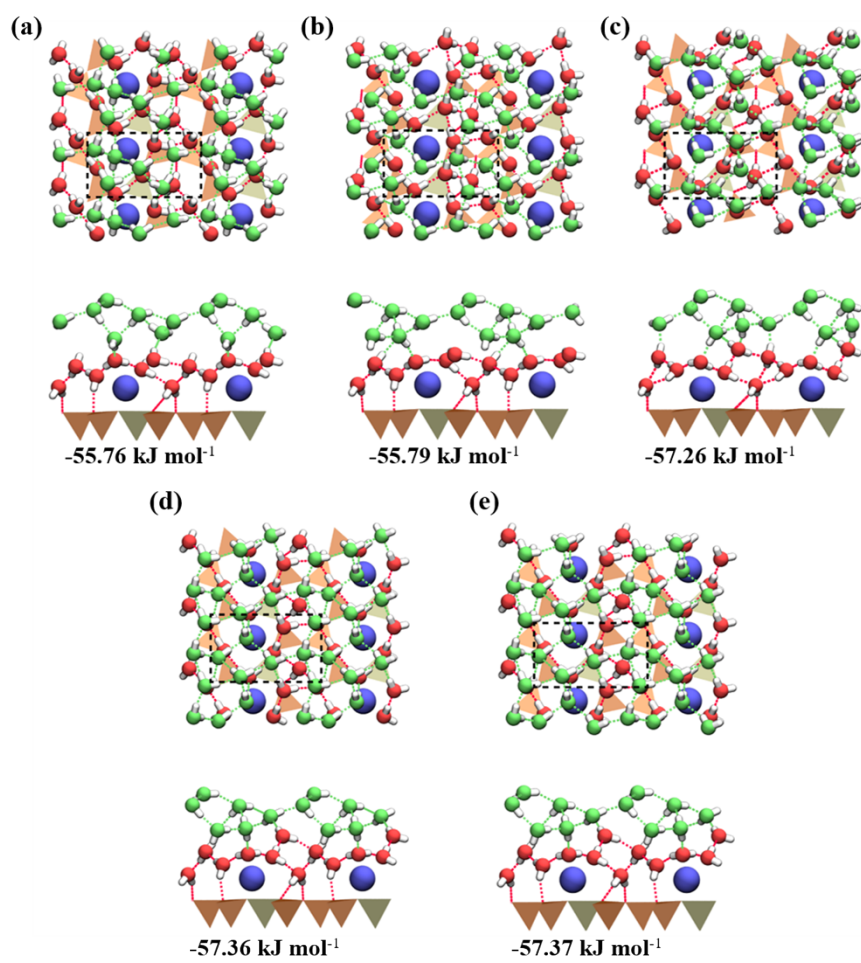

**Fig. S4** Top and side views of the optimized AB-stacked bilayer Ice-AL-II structures on mica surface.

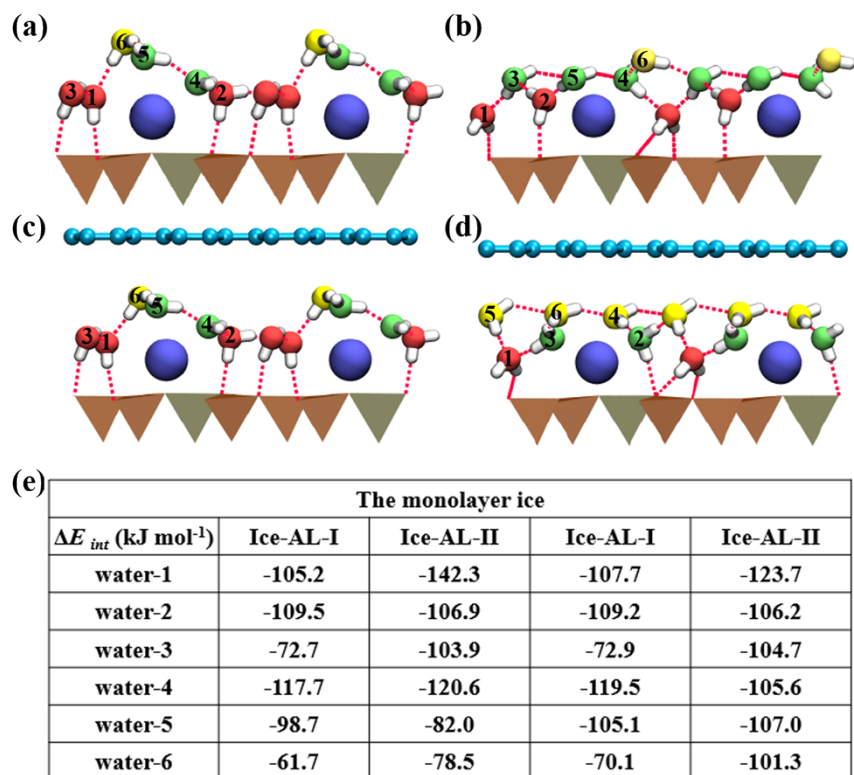

**Fig. S5** Calculated interaction energies ( $\Delta E_{int}$ , in  $\text{kJ mol}^{-1}$ ) of a water molecule in the unit cell with the remaining water molecules as well as the mica substrate (and graphene) for monolayer Ice-AL-I and monolayer Ice-AL-II. Structures of Ice-AL-I without (a) and with (c) a graphene coating. Structures of monolayer Ice-AL-II without (b) graphene coating and monolayer Ice-AL-II with (d) a graphene coating are shown, respectively. The water molecules in the unit cell are marked by numbers. (e) The calculated  $\Delta E_{int}$  for all water molecules in the unit cell shown in (a-d).

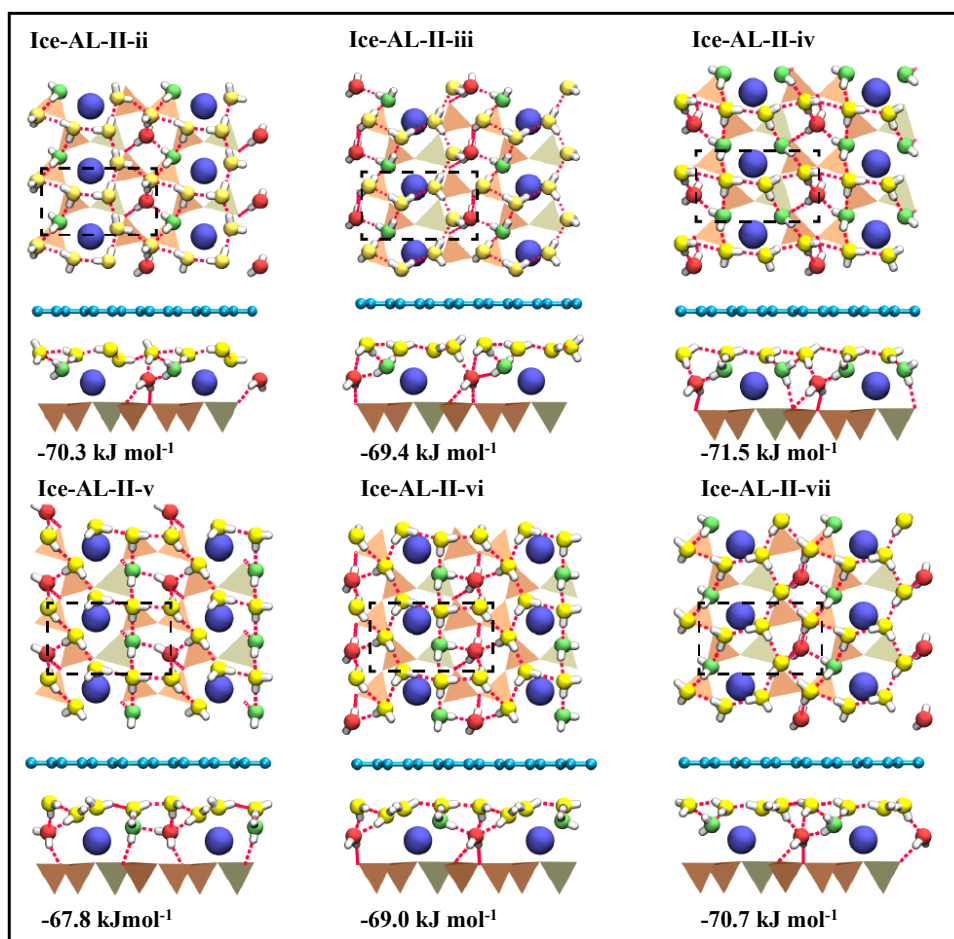

**Fig. S6** Six configurations observed in the AIMD simulation of water on mica surface with a graphene coating have the same lattice of oxygen atoms as Ice-AL-II, but have different H-bonds networks. The binding energy per water is shown below each configuration. For the sake of clarity, graphene is not shown in the top view.

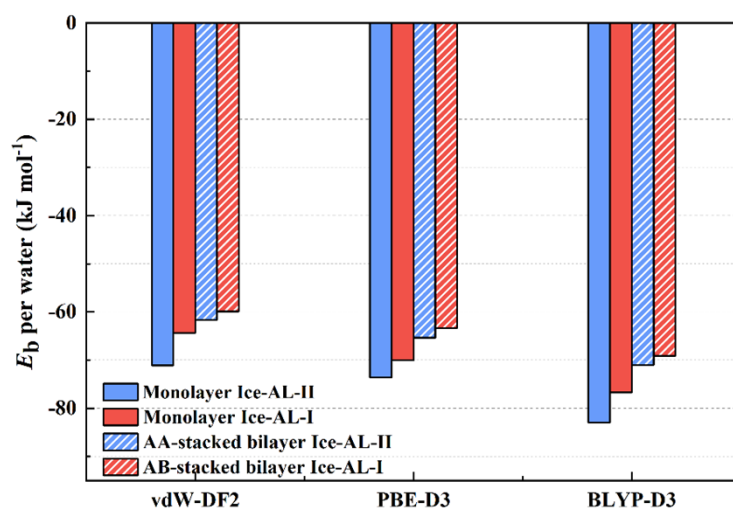

**Fig. S7** Calculated binding energies per water of Ice-AL-II and Ice-AL-I on mica surface with a graphene coating.



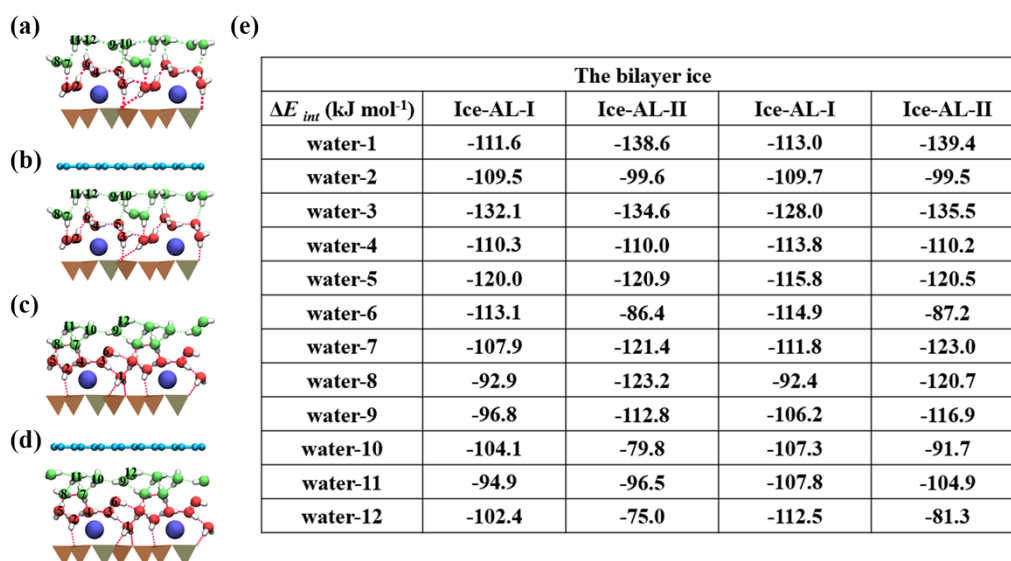

**Fig. S8** Optimized Structures of the AB-stacked bilayer Ice-AL-I structure without (a) and with (b) a graphene coating and AA-stacked bilayer Ice-AL-II structure without (c) and with (d) a graphene coating. The water molecules in the unit cell are marked by numbers. (e) The calculated  $\Delta E_{int}$  for all water molecules in the unit cell shown in (a-d).

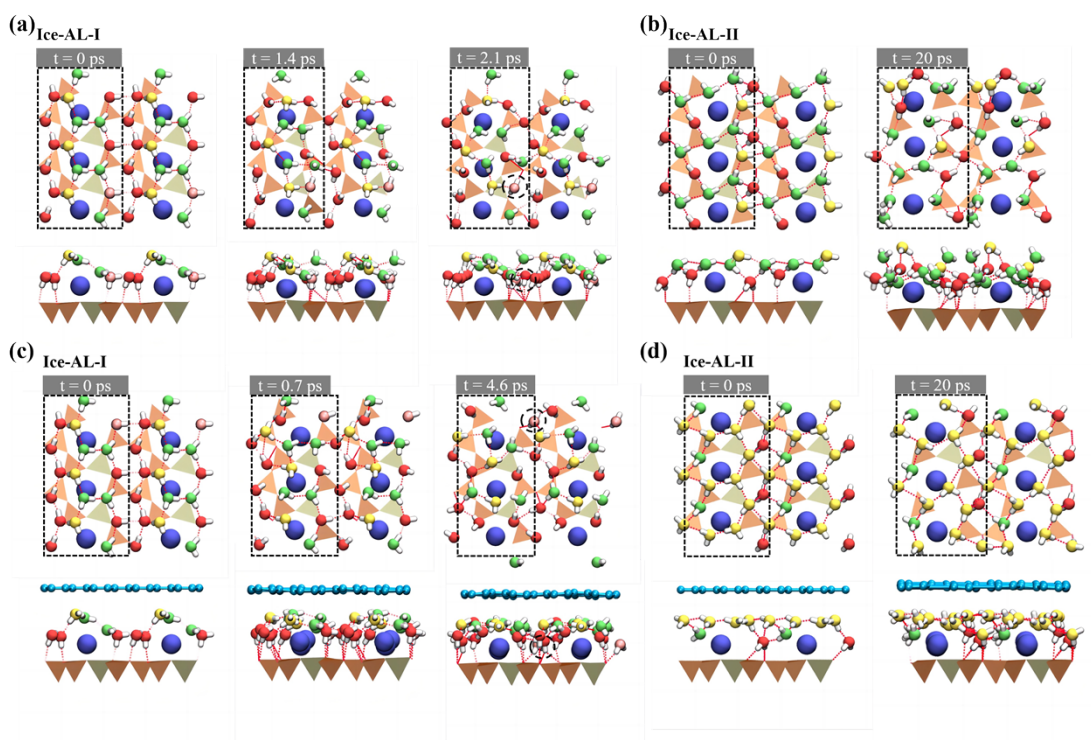

**Fig. S9** Stability of Ice-AL-I and Ice-AL-II in a relatively large system. Top and side views of snapshot structures taken from the AIMD simulation of monolayer (a) Ice-AL-I structure and monolayer (b) Ice-AL-II structure on a mica surface at 300 K. Top and side views of snapshot structures taken from the AIMD simulation of the monolayer (c) Ice-AL-I structure and monolayer (d) Ice-AL-II structure on a mica surface with a graphene coating at 300 K. Graphene is not shown in the top view for the sake of clarity. The water molecule adsorbed at site S1 transfers to site S2 and is highlighted by a pink sphere and a dashed circle. Red dashed lines denote hydrogen bonds. The dashed boxes represent simulation cells. Color codes: K (purple), H (white), O (pink, red, green, or yellow), C (cyan).

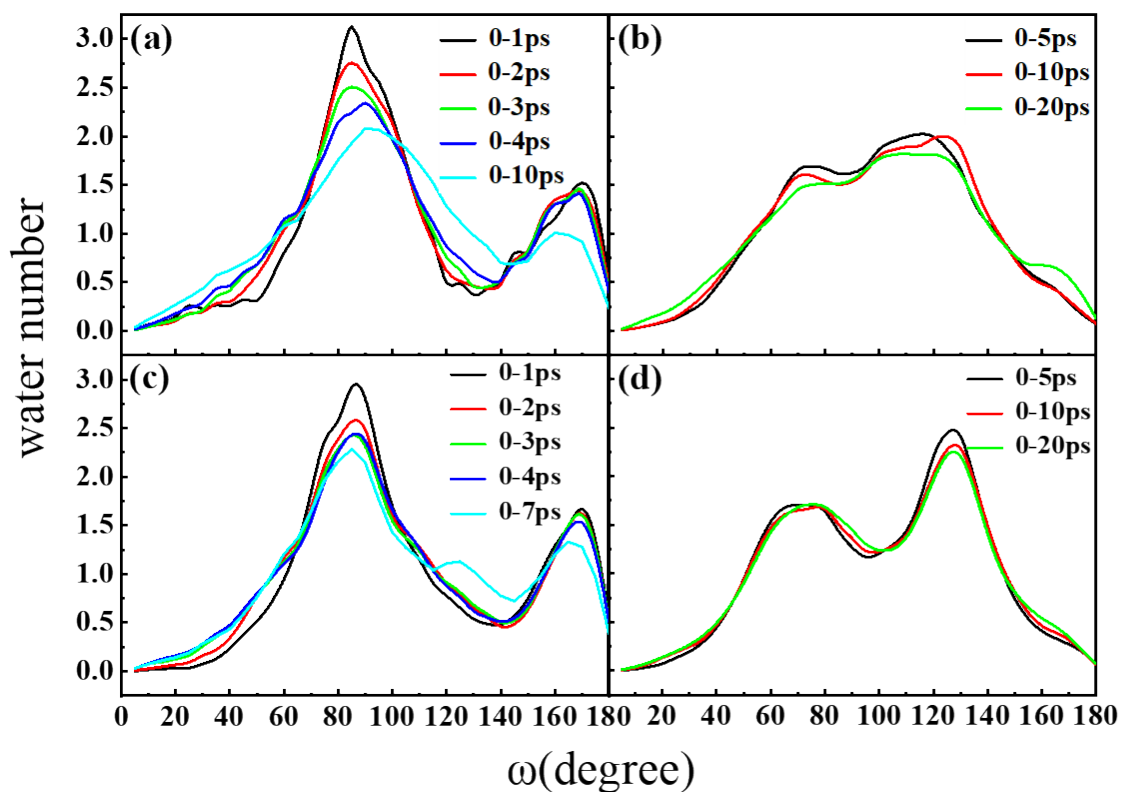

**Fig. S10** Distributions of the angle ( $\omega$ ) between the z axis (normal to the mica surface) and the OH bonds of water molecules at 300 K for the (a) monolayer Ice-AL-I structure and (b) monolayer Ice-AL-II structure, as well as the (c) monolayer Ice-AL-I structure and (d) monolayer Ice-AL-II structure with a graphene coating.

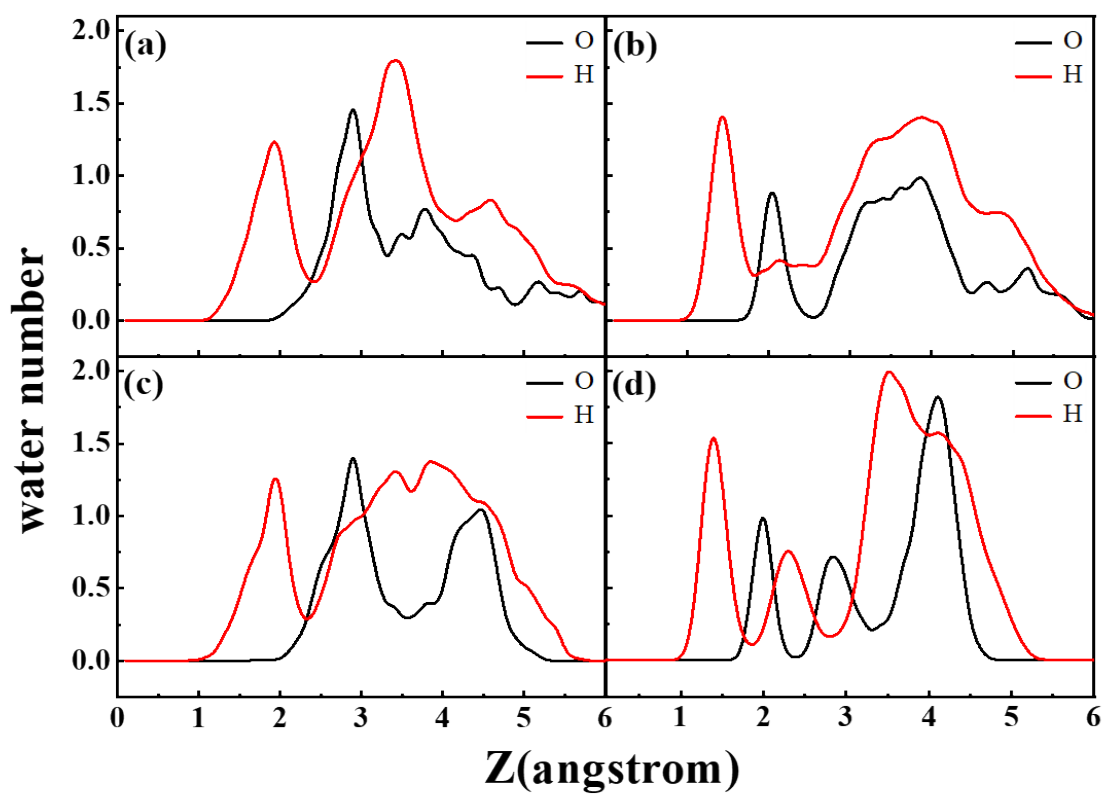

**Fig. S11** Density profiles of oxygen and hydrogen of water along the z axis at 250 K for the (a) monolayer Ice-AL-I structure and (b) monolayer Ice-AL-II structure, as well as the (c) monolayer Ice-AL-I structure and (d) monolayer Ice-AL-II structure with a graphene coating.

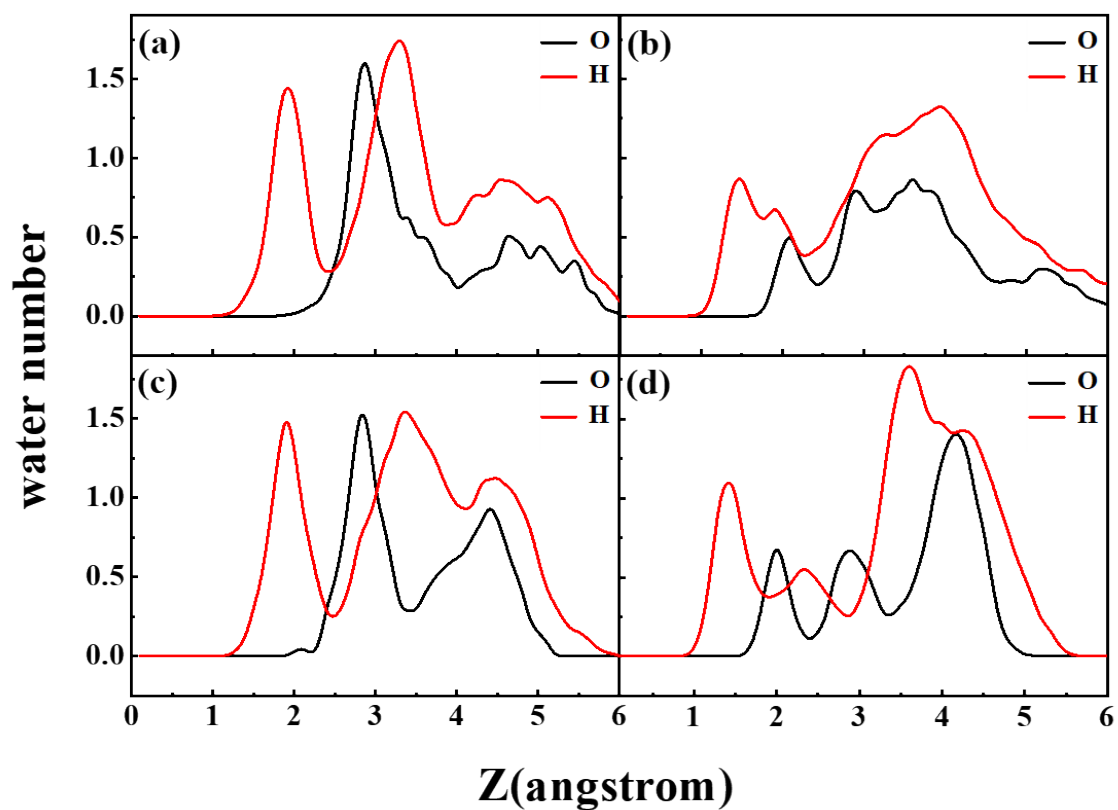

**Fig. S12** Density profiles of oxygen and hydrogen of water along the z axis at 300 K for the (a) monolayer Ice-AL-I structure and (b) monolayer Ice-AL-II structure, as well as the (c) monolayer Ice-AL-I structure and (d) monolayer Ice-AL-II structure with a graphene coating.

## Supporting Movies

Movie S1. Side view of spontaneous structural transition from Ice-AL-I to Ice-AL-II. The video was generated by ab initio molecular dynamics simulation of Ice-AL-I structure on mica surface at 300 K. Color codes: Si (Ocher), Al (Tan), K (purple), H (white), O (red, green or yellow).

Movie S2. Top view of spontaneous structural transition from Ice-AL-I to Ice-AL-II. The video was generated by ab initio molecular dynamics simulation of Ice-AL-I structure on mica surface at 300 K. Color codes: Si (Ocher), Al (Tan), K (purple), H (white), O (red, green or yellow).

Movie S3. Side view of spontaneous structural transition from Ice-AL-I to Ice-AL-II. The video was generated by ab initio molecular dynamics simulation of Ice-AL-I structure on mica surface with a graphene coating at 300 K. Color codes: Si (Ocher), Al (Tan), K (purple), H (white), O (red, green or yellow), C(cyan).

Movie S4. Top view of spontaneous structural transition from Ice-AL-I to Ice-AL-II. The video was generated by ab initio molecular dynamics simulation of Ice-AL-I structure on mica surface with a graphene coating at 300 K. Graphene is not shown for the sake of clarity. Color codes: Si (Ocher), Al (Tan), K (purple), H (white), O (red, green or yellow).

Movie S5. Instability of Ice-AL-I structure on mica surface (side view). The video was generated by ab initio molecular dynamics simulation of Ice-AL-I structure on mica surface at 250 K using a relatively large system. Color codes: Si (Ocher), Al (Tan), K (purple), H (white), O (red, green or yellow).

Movie S6. Instability of Ice-AL-I structure on mica surface (top view). The video was generated by ab initio molecular dynamics simulation of Ice-AL-I structure on mica surface at 250 K using a relatively large system. Color codes: Si (Ocher), Al (Tan), K (purple), H (white), O (red, green or yellow).

Movie S7. Stability of Ice-AL-II structure on mica surface (side view). The video was generated by ab initio molecular dynamics simulation of Ice-AL-II structure on mica surface at 250 K using a relatively large system. Color codes: Si (Ocher), Al (Tan), K (purple), H (white), O (red, green or yellow).

Movie S8. Stability of Ice-AL-II structure on mica surface (top view). The video was generated by ab initio molecular dynamics simulation of Ice-AL-II structure on mica surface at 250 K using a relatively large system. Color codes: Si (Ocher), Al (Tan), K (purple), H (white), O (red, green or yellow).

Movie S9. Instability of Ice-AL-I structure on mica surface with a graphene coating (side view). The video was generated by ab initio molecular dynamics simulation of Ice-AL-I structure on mica surface with a graphene coating at 250 K using a relatively large system. Color codes: Si (Ocher), Al (Tan), K (purple), H (white), O (red, green or yellow), C(cyan).

Movie S10. Instability of Ice-AL-I structure on mica surface with a graphene coating (top view). The video was generated by ab initio molecular dynamics simulation of Ice-AL-I structure on mica surface with a graphene coating at 250 K using a relatively large

system. Color codes: Si (Ocher), Al (Tan), K (purple), H (white), O (red, green or yellow).

Movie S11. Stability of Ice-AL-II structure on mica surface with a graphene coating (side view). The video was generated by ab initio molecular dynamics simulation of Ice-AL-II structure on mica surface with a graphene coating at 250 K using a relatively large system. Color codes: Si (Ocher), Al (Tan), K (purple), H (white), O (red, green or yellow), C(cyan).

Movie S12. Stability of Ice-AL-II structure on mica surface with a graphene coating (top view). The video was generated by ab initio molecular dynamics simulation of Ice-AL-II structure on mica surface with a graphene coating at 250 K using a relatively large system. Color codes: Si (Ocher), Al (Tan), K (purple), H (white), O (red, green or yellow).
